# Supplementary material
Source: MDPI journal article supplement (https://www.mdpi.com/2312-7481/4/4/58)

# checkCIF/PLATON report

You have not supplied any structure factors. As a result the full set of tests cannot be run.

THIS REPORT IS FOR GUIDANCE ONLY. IF USED AS PART OF A REVIEW PROCEDURE FOR PUBLICATION, IT SHOULD NOT REPLACE THE EXPERTISE OF AN EXPERIENCED CRYSTALLOGRAPHIC REFEREE.

No syntax errors found.      CIF dictionary      Interpreting this report

## Datablock: shelx\_Sam\_AH166

---

|                 |                        |                                 |
|-----------------|------------------------|---------------------------------|
| Bond precision: | C-C = 0.0173 A         | Wavelength=0.71073              |
| Cell:           | a=10.5126(5)           | b=18.8316(10)      c=12.7477(5) |
|                 | alpha=90               | beta=97.445(5)      gamma=90    |
| Temperature:    | 120 K                  |                                 |
|                 | Calculated             | Reported                        |
| Volume          | 2502.4(2)              | 2502.4(2)                       |
| Space group     | P 21/n                 | P 21/n                          |
| Hall group      | -P 2yn                 | -P 2yn                          |
| Moiety formula  | C39 H42 Cl3 N9 Nd2 O18 | ?                               |
| Sum formula     | C39 H42 Cl3 N9 Nd2 O18 | C39 H42 Cl3 N9 Nd2 O18          |
| Mr              | 1319.65                | 1319.64                         |
| Dx,g cm-3       | 1.751                  | 1.751                           |
| Z               | 2                      | 2                               |
| Mu (mm-1)       | 2.291                  | 2.291                           |
| F000            | 1308.0                 | 1308.0                          |
| F000'           | 1308.67                |                                 |
| h,k,lmax        | 12,22,15               | 12,22,15                        |
| Nref            | 4438                   | 4419                            |
| Tmin,Tmax       | 0.872,0.892            | 0.772,1.000                     |
| Tmin'           | 0.833                  |                                 |

Correction method= # Reported T Limits: Tmin=0.772 Tmax=1.000  
AbsCorr = MULTI-SCAN

Data completeness= 0.996      Theta(max)= 25.040

R(reflections)= 0.0776( 3048)      wR2(reflections)= 0.1942( 4419)

S = 1.067      Npar= 325

---

The following ALERTS were generated. Each ALERT has the format

**test-name\_ALERT\_alert-type\_alert-level.**

Click on the hyperlinks for more details of the test.

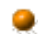

#### Alert level B

PLAT220\_ALERT\_2\_B Non-Solvent Resd 1 C Ueq(max)/Ueq(min) Range 10.0 Ratio

**Author Response: it refers to the thermal ellipsoids of particular atoms in our structure.**

PLAT242\_ALERT\_2\_B Low 'MainMol' Ueq as Compared to Neighbors of C100 Check

**Author Response: This is due to the fact that this position is shared by Cl atom and CN group.**

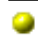

#### Alert level C

PLAT220\_ALERT\_2\_C Non-Solvent Resd 1 N Ueq(max)/Ueq(min) Range 3.2 Ratio

**Author Response: it refers to the thermal ellipsoids of particular atoms in our structure.**

PLAT234\_ALERT\_4\_C Large Hirshfeld Difference O21D --C21D 0.16 Ang.  
PLAT234\_ALERT\_4\_C Large Hirshfeld Difference N1D --C2D 0.17 Ang.  
PLAT234\_ALERT\_4\_C Large Hirshfeld Difference N11D --C12D 0.18 Ang.  
PLAT242\_ALERT\_2\_C Low 'MainMol' Ueq as Compared to Neighbors of N1D Check

**Author Response: This is due to the fact that this position is shared by Cl atom and CN group.**

PLAT242\_ALERT\_2\_C Low 'MainMol' Ueq as Compared to Neighbors of N21D Check

**Author Response: This is due to the fact that this position is shared by Cl atom and CN group.**

PLAT342\_ALERT\_3\_C Low Bond Precision on C-C Bonds ..... 0.0173 Ang.  
PLAT369\_ALERT\_2\_C Long C(sp2)-C(sp2) Bond C5 - C6 . 1.53 Ang.  
PLAT369\_ALERT\_2\_C Long C(sp2)-C(sp2) Bond C12 - C16\_b . 1.53 Ang.

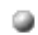

#### Alert level G

PLAT003\_ALERT\_2\_G Number of Uiso or Uij Restrained non-H Atoms ... 13 Report  
PLAT004\_ALERT\_5\_G Polymeric Structure Found with Maximum Dimension 2 Info  
PLAT083\_ALERT\_2\_G SHELXL Second Parameter in WGHT Unusually Large 39.35 Why ?  
PLAT171\_ALERT\_4\_G The CIF-Embedded .res File Contains EADP Records 1 Report  
PLAT177\_ALERT\_4\_G The CIF-Embedded .res File Contains DELU Records 1 Report  
PLAT186\_ALERT\_4\_G The CIF-Embedded .res File Contains ISOR Records 1 Report  
PLAT230\_ALERT\_2\_G Hirshfeld Test Diff for N100 --C100 . 18.0 s.u.  
PLAT300\_ALERT\_4\_G Atom Site Occupancy of C111 Constrained at 0.5 Check  
PLAT300\_ALERT\_4\_G Atom Site Occupancy of N111 Constrained at 0.5 Check  
PLAT300\_ALERT\_4\_G Atom Site Occupancy of C111 Constrained at 0.5 Check  
PLAT301\_ALERT\_3\_G Main Residue Disorder .....(Resd 1 ) 3% Note  
PLAT333\_ALERT\_2\_G Large Aver C6-Ring C-C Dist. C1 -C6 1.45 Ang.  
PLAT333\_ALERT\_2\_G Large Aver C6-Ring C-C Dist. C11 -C16 1.46 Ang.

|                   |                                |                        |           |       |      |       |
|-------------------|--------------------------------|------------------------|-----------|-------|------|-------|
| PLAT371_ALERT_2_G | Long                           | C(sp2)-C(sp1) Bond     | C1 - C100 | .     | 1.57 | Ang.  |
| PLAT380_ALERT_4_G | Incorrectly?                   | Oriented X(sp2)-Methyl | Moiety    | ..... | C2D  | Check |
| PLAT380_ALERT_4_G | Incorrectly?                   | Oriented X(sp2)-Methyl | Moiety    | ..... | C3D  | Check |
| PLAT380_ALERT_4_G | Incorrectly?                   | Oriented X(sp2)-Methyl | Moiety    | ..... | C12D | Check |
| PLAT380_ALERT_4_G | Incorrectly?                   | Oriented X(sp2)-Methyl | Moiety    | ..... | C13D | Check |
| PLAT380_ALERT_4_G | Incorrectly?                   | Oriented X(sp2)-Methyl | Moiety    | ..... | C22D | Check |
| PLAT380_ALERT_4_G | Incorrectly?                   | Oriented X(sp2)-Methyl | Moiety    | ..... | C23D | Check |
| PLAT720_ALERT_4_G | Number of Unusual/Non-Standard | Labels                 | .....     |       | 6    | Note  |
| PLAT773_ALERT_2_G | Check long C-C Bond in CIF:    | C11 --C111             |           |       | 1.70 | Ang.  |
| PLAT860_ALERT_3_G | Number of Least-Squares        | Restraints             | .....     |       | 42   | Note  |

---

0 **ALERT level A** = Most likely a serious problem - resolve or explain  
 2 **ALERT level B** = A potentially serious problem, consider carefully  
 9 **ALERT level C** = Check. Ensure it is not caused by an omission or oversight  
 23 **ALERT level G** = General information/check it is not something unexpected

0 ALERT type 1 CIF construction/syntax error, inconsistent or missing data  
 14 ALERT type 2 Indicator that the structure model may be wrong or deficient  
 3 ALERT type 3 Indicator that the structure quality may be low  
 16 ALERT type 4 Improvement, methodology, query or suggestion  
 1 ALERT type 5 Informative message, check

---

It is advisable to attempt to resolve as many as possible of the alerts in all categories. Often the minor alerts point to easily fixed oversights, errors and omissions in your CIF or refinement strategy, so attention to these fine details can be worthwhile. In order to resolve some of the more serious problems it may be necessary to carry out additional measurements or structure refinements. However, the purpose of your study may justify the reported deviations and the more serious of these should normally be commented upon in the discussion or experimental section of a paper or in the "special\_details" fields of the CIF. checkCIF was carefully designed to identify outliers and unusual parameters, but every test has its limitations and alerts that are not important in a particular case may appear. Conversely, the absence of alerts does not guarantee there are no aspects of the results needing attention. It is up to the individual to critically assess their own results and, if necessary, seek expert advice.

### Publication of your CIF in IUCr journals

A basic structural check has been run on your CIF. These basic checks will be run on all CIFs submitted for publication in IUCr journals (*Acta Crystallographica*, *Journal of Applied Crystallography*, *Journal of Synchrotron Radiation*); however, if you intend to submit to *Acta Crystallographica Section C* or *E* or *IUCrData*, you should make sure that full publication checks are run on the final version of your CIF prior to submission.

### Publication of your CIF in other journals

Please refer to the *Notes for Authors* of the relevant journal for any special instructions relating to CIF submission.

---

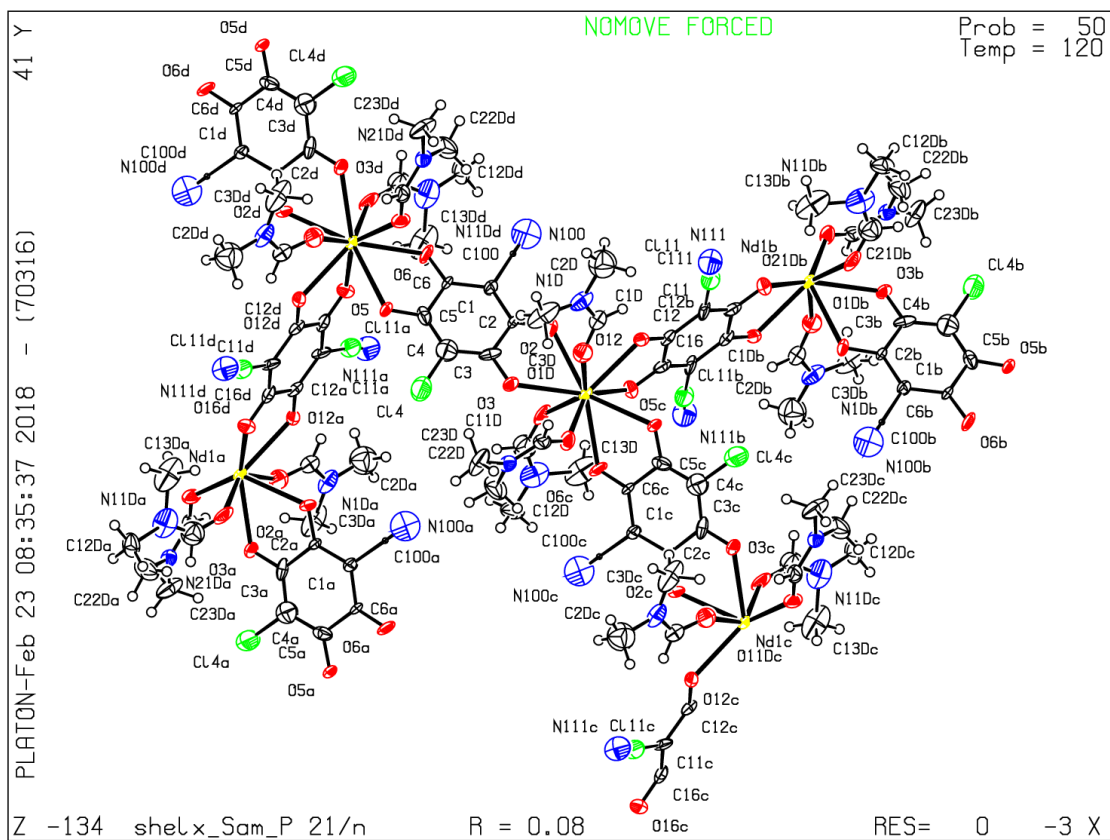

Supplement: s1 [file s1 › 1_checkcif.pdf]
