# Supplementary material
Source: MDPI journal article supplement (https://www.mdpi.com/2312-7481/4/4/58)

# checkCIF/PLATON report

You have not supplied any structure factors. As a result the full set of tests cannot be run.

THIS REPORT IS FOR GUIDANCE ONLY. IF USED AS PART OF A REVIEW PROCEDURE FOR PUBLICATION, IT SHOULD NOT REPLACE THE EXPERTISE OF AN EXPERIENCED CRYSTALLOGRAPHIC REFEREE.

No syntax errors found.      CIF dictionary      Interpreting this report

## Datablock: shelx\_Sam\_AH148

---

|                 |                       |                                |
|-----------------|-----------------------|--------------------------------|
| Bond precision: | C-C = 0.0107 A        | Wavelength=0.71073             |
| Cell:           | a=9.5974(2)           | b=16.4105(3)      c=15.3719(3) |
|                 | alpha=90              | beta=91.111(2)      gamma=90   |
| Temperature:    | 120 K                 |                                |
|                 | Calculated            | Reported                       |
| Volume          | 2420.59(8)            | 2420.59(8)                     |
| Space group     | P 21/n                | P 21/n                         |
| Hall group      | -P 2yn                | -P 2yn                         |
| Moiety formula  | C33 Ce2 Cl3 N3 O18 S6 | ?                              |
| Sum formula     | C33 Ce2 Cl3 N3 O18 S6 | C33 Ce2 Cl3 N3 O18 S6          |
| Mr              | 1305.30               | 1305.31                        |
| Dx,g cm-3       | 1.791                 | 1.791                          |
| Z               | 2                     | 2                              |
| Mu (mm-1)       | 2.351                 | 2.351                          |
| F000            | 1252.0                | 1252.0                         |
| F000'           | 1253.91               |                                |
| h,k,lmax        | 12,21,20              | 11,21,19                       |
| Nref            | 5845                  | 4858                           |
| Tmin,Tmax       | 0.868,0.932           | 0.934,1.000                    |
| Tmin'           | 0.848                 |                                |

Correction method= # Reported T Limits: Tmin=0.934 Tmax=1.000  
AbsCorr = MULTI-SCAN

Data completeness= 0.831      Theta(max)= 28.009

R(reflections)= 0.0612( 4062)      wR2(reflections)= 0.1612( 4858)

S = 1.066      Npar= 338

---

The following ALERTS were generated. Each ALERT has the format  
**test-name\_ALERT\_alert-type\_alert-level**.  
Click on the hyperlinks for more details of the test.

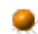

#### Alert level B

PLAT220\_ALERT\_2\_B Non-Solvent Resd 1 S Ueq(max)/Ueq(min) Range 10.0 Ratio

**Author Response:** This alert refers to the thermal ellipsoids of particular atom of S in

PLAT241\_ALERT\_2\_B High 'MainMol' Ueq as Compared to Neighbors of C2D Check

**Author Response:** thi is due to atoms in the disordered coordinated DMSO solvent. Several of the atoms are still not ideally shaped, however, this does not indicate an incorrect atom-type assignment.

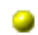

#### Alert level C

PLAT213\_ALERT\_2\_C Atom S21D has ADP max/min Ratio ..... 3.1 oblate  
PLAT220\_ALERT\_2\_C Non-Solvent Resd 1 C Ueq(max)/Ueq(min) Range 5.1 Ratio

**Author Response:** This alert refers to the thermal ellipsoids of particular atom of S in

PLAT241\_ALERT\_2\_C High 'MainMol' Ueq as Compared to Neighbors of C1D Check

**Author Response:** thi is due to atoms in the disordered coordinated DMSO solvent. Several of the atoms are still not ideally shaped, however, this does not indicate an incorrect atom-type assignment.

PLAT241\_ALERT\_2\_C High 'MainMol' Ueq as Compared to Neighbors of C12D Check

**Author Response:** thi is due to atoms in the disordered coordinated DMSO solvent. Several of the atoms are still not ideally shaped, however, this does not indicate an incorrect atom-type assignment.

PLAT241\_ALERT\_2\_C High 'MainMol' Ueq as Compared to Neighbors of C22D Check

**Author Response:** thi is due to atoms in the disordered coordinated DMSO solvent. Several of the atoms are still not ideally shaped, however, this does not indicate an incorrect atom-type assignment.

PLAT242\_ALERT\_2\_C Low 'MainMol' Ueq as Compared to Neighbors of C4 Check  
PLAT342\_ALERT\_3\_C Low Bond Precision on C-C Bonds ..... 0.01067 Ang.

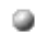

#### Alert level G

PLAT003\_ALERT\_2\_G Number of Uiso or Uij Restrained non-H Atoms ... 6 Report  
PLAT004\_ALERT\_5\_G Polymeric Structure Found with Maximum Dimension 1 Info  
PLAT040\_ALERT\_1\_G No H-atoms in this Carbon Containing Compound .. Please Check  
PLAT083\_ALERT\_2\_G SHELXL Second Parameter in WGHT Unusually Large 27.10 Why ?

|                   |                                                  |        |        |
|-------------------|--------------------------------------------------|--------|--------|
| PLAT171_ALERT_4_G | The CIF-Embedded .res File Contains EADP Records | 3      | Report |
| PLAT177_ALERT_4_G | The CIF-Embedded .res File Contains DELU Records | 1      | Report |
| PLAT186_ALERT_4_G | The CIF-Embedded .res File Contains ISOR Records | 1      | Report |
| PLAT230_ALERT_2_G | Hirshfeld Test Diff for C14 --C4 .               | 10.4   | s.u.   |
| PLAT230_ALERT_2_G | Hirshfeld Test Diff for C111 --C11 .             | 9.0    | s.u.   |
| PLAT230_ALERT_2_G | Hirshfeld Test Diff for S1D --C1D .              | 12.3   | s.u.   |
| PLAT230_ALERT_2_G | Hirshfeld Test Diff for S1D --C2D .              | 15.2   | s.u.   |
| PLAT230_ALERT_2_G | Hirshfeld Test Diff for S2D --C1D .              | 7.2    | s.u.   |
| PLAT230_ALERT_2_G | Hirshfeld Test Diff for S2D --C2D .              | 10.4   | s.u.   |
| PLAT230_ALERT_2_G | Hirshfeld Test Diff for S11D --C11D .            | 8.6    | s.u.   |
| PLAT230_ALERT_2_G | Hirshfeld Test Diff for S11D --C12D .            | 5.5    | s.u.   |
| PLAT230_ALERT_2_G | Hirshfeld Test Diff for S21D --C21D .            | 5.7    | s.u.   |
| PLAT230_ALERT_2_G | Hirshfeld Test Diff for S21D --C22D .            | 18.0   | s.u.   |
| PLAT230_ALERT_2_G | Hirshfeld Test Diff for S22D --O21D .            | 13.2   | s.u.   |
| PLAT230_ALERT_2_G | Hirshfeld Test Diff for C4 --C40 .               | 10.4   | s.u.   |
| PLAT300_ALERT_4_G | Atom Site Occupancy of C11 Constrained at        | 0.5    | Check  |
| PLAT300_ALERT_4_G | Atom Site Occupancy of C14 Constrained at        | 0.5    | Check  |
| PLAT300_ALERT_4_G | Atom Site Occupancy of C111 Constrained at       | 0.5    | Check  |
| PLAT300_ALERT_4_G | Atom Site Occupancy of S1D Constrained at        | 0.5    | Check  |
| PLAT300_ALERT_4_G | Atom Site Occupancy of S2D Constrained at        | 0.5    | Check  |
| PLAT300_ALERT_4_G | Atom Site Occupancy of S11D Constrained at       | 0.5    | Check  |
| PLAT300_ALERT_4_G | Atom Site Occupancy of S12D Constrained at       | 0.5    | Check  |
| PLAT300_ALERT_4_G | Atom Site Occupancy of S21D Constrained at       | 0.3333 | Check  |
| PLAT300_ALERT_4_G | Atom Site Occupancy of S22D Constrained at       | 0.3333 | Check  |
| PLAT300_ALERT_4_G | Atom Site Occupancy of S23D Constrained at       | 0.3333 | Check  |
| PLAT300_ALERT_4_G | Atom Site Occupancy of N40 Constrained at        | 0.5    | Check  |
| PLAT300_ALERT_4_G | Atom Site Occupancy of N100 Constrained at       | 0.5    | Check  |
| PLAT300_ALERT_4_G | Atom Site Occupancy of N111 Constrained at       | 0.5    | Check  |
| PLAT300_ALERT_4_G | Atom Site Occupancy of C40 Constrained at        | 0.5    | Check  |
| PLAT300_ALERT_4_G | Atom Site Occupancy of C100 Constrained at       | 0.5    | Check  |
| PLAT300_ALERT_4_G | Atom Site Occupancy of C111 Constrained at       | 0.5    | Check  |
| PLAT301_ALERT_3_G | Main Residue Disorder .....(Resd 1 )             | 20%    | Note   |
| PLAT432_ALERT_2_G | Short Inter X...Y Contact C111 ..S11D            | 3.20   | Ang.   |
| PLAT773_ALERT_2_G | Check long C-C Bond in CIF: C11 --C111           | 1.79   | Ang.   |
| PLAT802_ALERT_4_G | CIF Input Record(s) with more than 80 Characters | 1      | Info   |
| PLAT860_ALERT_3_G | Number of Least-Squares Restraints .....         | 37     | Note   |

---

0 **ALERT level A** = Most likely a serious problem - resolve or explain  
 2 **ALERT level B** = A potentially serious problem, consider carefully  
 7 **ALERT level C** = Check. Ensure it is not caused by an omission or oversight  
 40 **ALERT level G** = General information/check it is not something unexpected

1 ALERT type 1 CIF construction/syntax error, inconsistent or missing data  
 24 ALERT type 2 Indicator that the structure model may be wrong or deficient  
 3 ALERT type 3 Indicator that the structure quality may be low  
 20 ALERT type 4 Improvement, methodology, query or suggestion  
 1 ALERT type 5 Informative message, check

---

It is advisable to attempt to resolve as many as possible of the alerts in all categories. Often the minor alerts point to easily fixed oversights, errors and omissions in your CIF or refinement strategy, so attention to these fine details can be worthwhile. In order to resolve some of the more serious problems it may be necessary to carry out additional measurements or structure refinements. However, the purpose of your study may justify the reported deviations and the more serious of these should normally be commented upon in the discussion or experimental section of a paper or in the "special\_details" fields of the CIF. checkCIF was carefully designed to identify outliers and unusual parameters, but every test has its limitations and alerts that are not important in a particular case may appear. Conversely, the absence of alerts does not guarantee there are no aspects of the results needing attention. It is up to the individual to critically assess their own results and, if necessary, seek expert advice.

### **Publication of your CIF in IUCr journals**

A basic structural check has been run on your CIF. These basic checks will be run on all CIFs submitted for publication in IUCr journals (*Acta Crystallographica*, *Journal of Applied Crystallography*, *Journal of Synchrotron Radiation*); however, if you intend to submit to *Acta Crystallographica Section C* or *E* or *IUCrData*, you should make sure that full publication checks are run on the final version of your CIF prior to submission.

### **Publication of your CIF in other journals**

Please refer to the *Notes for Authors* of the relevant journal for any special instructions relating to CIF submission.

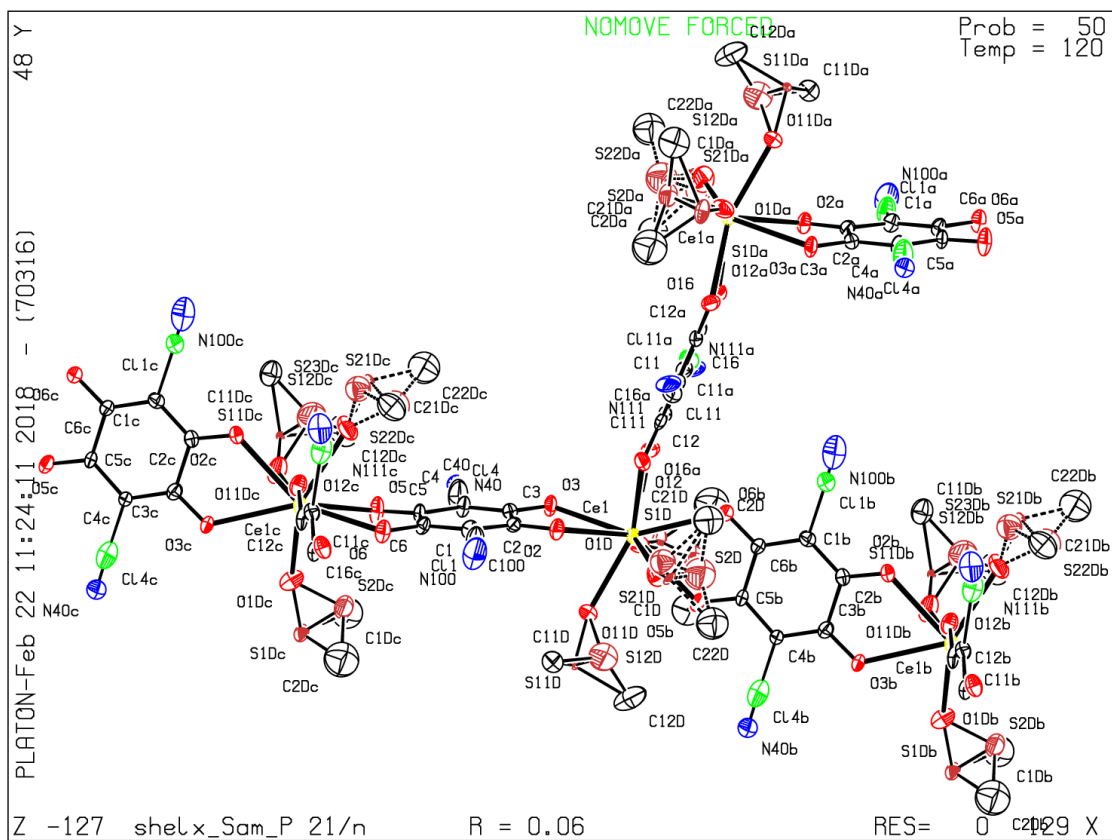

Supplement: s1 [file s1 › 4-checkcif.pdf]
