# Supplementary material
Source: MDPI journal article supplement (https://www.mdpi.com/2312-7481/4/4/58)

# checkCIF/PLATON report

You have not supplied any structure factors. As a result the full set of tests cannot be run.

THIS REPORT IS FOR GUIDANCE ONLY. IF USED AS PART OF A REVIEW PROCEDURE FOR PUBLICATION, IT SHOULD NOT REPLACE THE EXPERTISE OF AN EXPERIENCED CRYSTALLOGRAPHIC REFEREE.

No syntax errors found.      CIF dictionary      Interpreting this report

## Datablock: shelx\_Sam\_AH151

---

Bond precision:    C-C = 0.0110 Å                      Wavelength=0.71073

Cell:                      a=9.6212(3)              b=16.3828(4)              c=15.2790(3)  
                            alpha=90              beta=91.989(2)              gamma=90

Temperature:            120 K

|                | Calculated            | Reported              |
|----------------|-----------------------|-----------------------|
| Volume         | 2406.86(11)           | 2406.86(11)           |
| Space group    | P 21/n                | P 21/n                |
| Hall group     | -P 2yn                | -P 2yn                |
| Moiety formula | C33 Cl3 N3 Nd2 O18 S6 | C33 Cl3 N3 Nd2 O18 S6 |
| Sum formula    | C33 Cl3 N3 Nd2 O18 S6 | C33 Cl3 N3 Nd2 O18 S6 |
| Mr             | 1313.55               | 1313.55               |
| Dx,g cm-3      | 1.813                 | 1.812                 |
| Z              | 2                     | 2                     |
| Mu (mm-1)      | 2.630                 | 2.630                 |
| F000           | 1260.0                | 1260.0                |
| F000'          | 1262.14               |                       |
| h,k,lmax       | 11,19,18              | 11,19,18              |
| Nref           | 4267                  | 4251                  |
| Tmin,Tmax      | 0.854,0.949           | 0.946,1.000           |
| Tmin'          | 0.854                 |                       |

Correction method= # Reported T Limits: Tmin=0.946 Tmax=1.000  
AbsCorr = MULTI-SCAN

Data completeness= 0.996                      Theta(max)= 25.036

R(reflections)= 0.0553( 3221)              wR2(reflections)= 0.1375( 4251)

S = 1.029                      Npar= 343

---

The following ALERTS were generated. Each ALERT has the format

**test-name\_ALERT\_alert-type\_alert-level.**

Click on the hyperlinks for more details of the test.

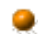

#### Alert level B

PLAT220\_ALERT\_2\_B Non-Solvent Resd 1 C Ueq(max)/Ueq(min) Range 8.8 Ratio

**Author Response: It refers to the thermal ellipsoids of particular atoms in our structure.**

PLAT241\_ALERT\_2\_B High 'MainMol' Ueq as Compared to Neighbors of C4D Check

**Author Response: ISOR restraints were applied to atom S22D in the disordered coordinated DMSO. The atom was still not ideally shaped, however, this does not indicate an incorrect atom-type assignment.**

PLAT241\_ALERT\_2\_B High 'MainMol' Ueq as Compared to Neighbors of C22D Check

**Author Response: ISOR restraints were applied to atom S22D in the disordered coordinated DMSO. The atom was still not ideally shaped, however, this does not indicate an incorrect atom-type assignment.**

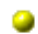

#### Alert level C

PLAT213\_ALERT\_2\_C Atom Old has ADP max/min Ratio ..... 3.3 prolat

PLAT241\_ALERT\_2\_C High 'MainMol' Ueq as Compared to Neighbors of Old Check

**Author Response: ISOR restraints were applied to atom S22D in the disordered coordinated DMSO. The atom was still not ideally shaped, however, this does not indicate an incorrect atom-type assignment.**

PLAT241\_ALERT\_2\_C High 'MainMol' Ueq as Compared to Neighbors of Cl3D Check

**Author Response: ISOR restraints were applied to atom S22D in the disordered coordinated DMSO. The atom was still not ideally shaped, however, this does not indicate an incorrect atom-type assignment.**

PLAT242\_ALERT\_2\_C Low 'MainMol' Ueq as Compared to Neighbors of C1 Check

PLAT342\_ALERT\_3\_C Low Bond Precision on C-C Bonds ..... 0.011 Ang.

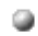

#### Alert level G

PLAT003\_ALERT\_2\_G Number of Uiso or Uij Restrained non-H Atoms ... 7 Report

PLAT004\_ALERT\_5\_G Polymeric Structure Found with Maximum Dimension 1 Info

PLAT040\_ALERT\_1\_G No H-atoms in this Carbon Containing Compound .. Please Check

PLAT083\_ALERT\_2\_G SHELXL Second Parameter in WGHT Unusually Large 16.90 Why ?

PLAT171\_ALERT\_4\_G The CIF-Embedded .res File Contains EADP Records 3 Report

PLAT177\_ALERT\_4\_G The CIF-Embedded .res File Contains DELU Records 1 Report

PLAT186\_ALERT\_4\_G The CIF-Embedded .res File Contains ISOR Records 1 Report

PLAT300\_ALERT\_4\_G Atom Site Occupancy of Cl1 Constrained at 0.5 Check

PLAT300\_ALERT\_4\_G Atom Site Occupancy of Cl4 Constrained at 0.5 Check

|                                                            |                          |       |       |
|------------------------------------------------------------|--------------------------|-------|-------|
| PLAT300_ALERT_4_G Atom Site Occupancy of C111              | Constrained at           | 0.5   | Check |
| PLAT300_ALERT_4_G Atom Site Occupancy of S1D               | Constrained at           | 0.5   | Check |
| PLAT300_ALERT_4_G Atom Site Occupancy of S2D               | Constrained at           | 0.5   | Check |
| PLAT300_ALERT_4_G Atom Site Occupancy of S11D              | Constrained at           | 0.5   | Check |
| PLAT300_ALERT_4_G Atom Site Occupancy of S12D              | Constrained at           | 0.5   | Check |
| PLAT300_ALERT_4_G Atom Site Occupancy of S21D              | Constrained at           | 0.75  | Check |
| PLAT300_ALERT_4_G Atom Site Occupancy of S22D              | Constrained at           | 0.25  | Check |
| PLAT300_ALERT_4_G Atom Site Occupancy of N100              | Constrained at           | 0.5   | Check |
| PLAT300_ALERT_4_G Atom Site Occupancy of N111              | Constrained at           | 0.5   | Check |
| PLAT300_ALERT_4_G Atom Site Occupancy of N400              | Constrained at           | 0.5   | Check |
| PLAT300_ALERT_4_G Atom Site Occupancy of C14D              | Constrained at           | 0.5   | Check |
| PLAT300_ALERT_4_G Atom Site Occupancy of C15D              | Constrained at           | 0.5   | Check |
| PLAT300_ALERT_4_G Atom Site Occupancy of C100              | Constrained at           | 0.5   | Check |
| PLAT300_ALERT_4_G Atom Site Occupancy of C111              | Constrained at           | 0.5   | Check |
| PLAT300_ALERT_4_G Atom Site Occupancy of C400              | Constrained at           | 0.5   | Check |
| PLAT301_ALERT_3_G Main Residue Disorder .....(Resd 1 )     |                          | 24%   | Note  |
| PLAT432_ALERT_2_G Short Inter X...Y Contact C14 ..C14D     |                          | 3.20  | Ang.  |
|                                                            | $1/2-x, -1/2+y, 3/2-z =$ | 2_546 | Check |
| PLAT432_ALERT_2_G Short Inter X...Y Contact C111 ..S2D     |                          | 3.14  | Ang.  |
|                                                            | $1/2+x, 1/2-y, -1/2+z =$ | 4_665 | Check |
| PLAT432_ALERT_2_G Short Inter X...Y Contact N400 ..C14D    |                          | 2.94  | Ang.  |
|                                                            | $1/2-x, -1/2+y, 3/2-z =$ | 2_546 | Check |
| PLAT432_ALERT_2_G Short Inter X...Y Contact C15D ..C15D    |                          | 2.91  | Ang.  |
|                                                            | $-x, 1-y, 1-z =$         | 3_566 | Check |
| PLAT773_ALERT_2_G Check long C-C Bond in CIF: C11 --C111   |                          | 1.75  | Ang.  |
| PLAT860_ALERT_3_G Number of Least-Squares Restraints ..... |                          | 42    | Note  |

---

0 **ALERT level A** = Most likely a serious problem - resolve or explain  
 3 **ALERT level B** = A potentially serious problem, consider carefully  
 5 **ALERT level C** = Check. Ensure it is not caused by an omission or oversight  
 31 **ALERT level G** = General information/check it is not something unexpected

1 ALERT type 1 CIF construction/syntax error, inconsistent or missing data  
 14 ALERT type 2 Indicator that the structure model may be wrong or deficient  
 3 ALERT type 3 Indicator that the structure quality may be low  
 20 ALERT type 4 Improvement, methodology, query or suggestion  
 1 ALERT type 5 Informative message, check

---

It is advisable to attempt to resolve as many as possible of the alerts in all categories. Often the minor alerts point to easily fixed oversights, errors and omissions in your CIF or refinement strategy, so attention to these fine details can be worthwhile. In order to resolve some of the more serious problems it may be necessary to carry out additional measurements or structure refinements. However, the purpose of your study may justify the reported deviations and the more serious of these should normally be commented upon in the discussion or experimental section of a paper or in the "special\_details" fields of the CIF. checkCIF was carefully designed to identify outliers and unusual parameters, but every test has its limitations and alerts that are not important in a particular case may appear. Conversely, the absence of alerts does not guarantee there are no aspects of the results needing attention. It is up to the individual to critically assess their own results and, if necessary, seek expert advice.

### **Publication of your CIF in IUCr journals**

A basic structural check has been run on your CIF. These basic checks will be run on all CIFs submitted for publication in IUCr journals (*Acta Crystallographica*, *Journal of Applied Crystallography*, *Journal of Synchrotron Radiation*); however, if you intend to submit to *Acta Crystallographica Section C* or *E* or *IUCrData*, you should make sure that full publication checks are run on the final version of your CIF prior to submission.

### **Publication of your CIF in other journals**

Please refer to the *Notes for Authors* of the relevant journal for any special instructions relating to CIF submission.

---

**PLATON version of 19/10/2018; check.def file version of 15/10/2018**

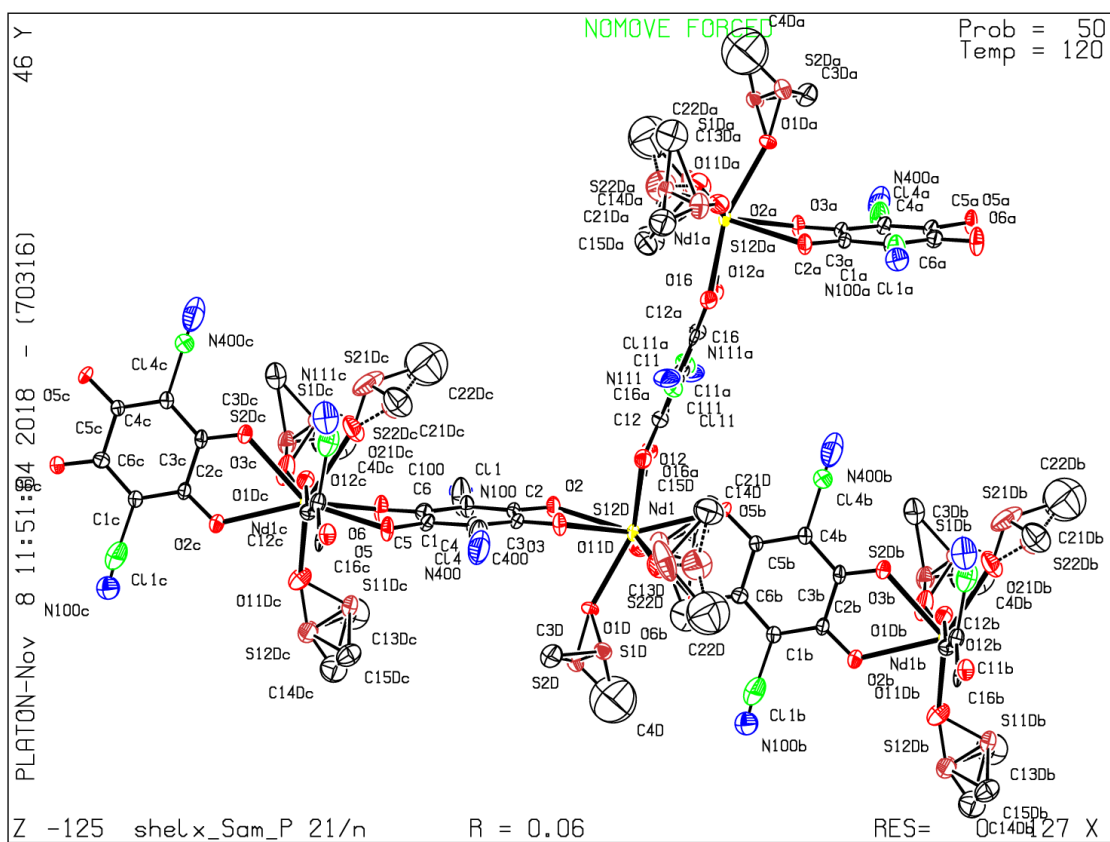

Supplement: s1 [file s1 › 5-checkcif.pdf]
