# Supplementary material
Source: MDPI journal article supplement (https://www.mdpi.com/2312-7481/4/4/58)
Supplement: s1 [file s1]

Archive with 6 entries (6 files):
- 1_checkcif.pdf
- 2_checkcif.pdf
- 3_checkcif.pdf
- 4-checkcif.pdf
- 5-checkcif.pdf
- magnetochemistry-supplementary.doc
